# Supplementary material
Source: publisher figshare collection journal article supplement (https://karger.figshare.com/ndownloader/files/36428454)
Supplement: Supplementary file 1 [file 36428454]

**Supplement S10: Continuous confounding factors on left ventricular ejection time (LV-ET) bias**

|  | LV-ET bias | | |
| --- | --- | --- | --- |
|  | coefficent | (95% CI) | p-value |
| EC Signal quality (propcycles) | 0.77 | (0.36 to 1.18) | <.001 |
| Intercept (propcycles=9%) | -36.48 | (-62.40 to -10.56) |  |
| Heart rate (HREC) | -1.26 | (-1.65 to -0.86) | <.001 |
| Intercept (HREC=121 bpm) | 47.44 | (33.59 to 61.29) |  |
| LV-ETEC | 0.92 | (0.72 to 1.13) | <.001 |
| Intercept (LV-ETEC=105ms) | -45.62 | (-59.73 to -31.51) |  |
| LV-ETTTE | -0.70 | (-1.12 to -0.28) | .001 |
| Intercept (LV-ETTTE=113ms) | 40.47 | (20.87 to 60.07) |  |

EC: Electrical Cardiometry, TTE: transthoracic echocardiography, propcycles: proportion of cycles with increasing or maximum EC signal quality within the 10s epoch
